# Supplementary material for: Structural Dynamics of the Bacillus subtilis MntR Transcription Factor Is Locked by Mn2+ Binding
Source: MDPI journal article supplement (doi:10.3390/ijms24020957), 2023-01-04
Supplement: s1 [file s1]

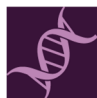

## Supporting Information

### **Structural dynamics of the *Bacillus subtilis* MntR transcription factor is locked by Mn<sup>2+</sup> binding**

Zoe Jelić Matošević <sup>1</sup>, Katarina Radman <sup>1</sup>, Jolene Loubser <sup>2</sup>, Ivo Crnolatac <sup>3</sup>, Ivo Piantanida <sup>3</sup>, Ignacy Cukrowski <sup>2</sup>, Ivana

Leščić Ašler <sup>4</sup> and Branimir Bertosa <sup>1,\*</sup>

<sup>1</sup> Department of Chemistry, Faculty of Science, University of Zagreb, Horvatovac 102a, HR-10000 Zagreb, Croatia

<sup>2</sup> Department of Chemistry, Faculty of Natural and Agricultural Sciences, University of Pretoria, Lynnwood Road, Hatfield, Pretoria 0002, South Africa

<sup>3</sup> Division of Organic Chemistry & Biochemistry, Ruđer Bošković Institute, Bijenička cesta 54, HR-10000 Zagreb, Croatia

<sup>4</sup> Division of Physical Chemistry, Ruđer Bošković Institute, Bijenička cesta 54, HR-10000 Zagreb, Croatia

\* Correspondence: bbertosa@chem.pmf.hr; Tel.: +385 1 4606 132

#### **Table of contents:**

|                                                                                                        |      |
|--------------------------------------------------------------------------------------------------------|------|
| 1. Systems used for parametrization of MntR-Mn <sup>2+</sup> interaction (Supplementary Table S1)      | S2   |
| 2. RMSD between crystal structures of MntR (Supplementary Table S2)                                    | S3   |
| 3. Parameters for the interaction of Mn <sup>2+</sup> ions and MntR protein (Supplementary Table S3)   | S-3  |
| 4. Charges of residues coordinating Mn <sup>2+</sup> ions in the MntR protein (Supplementary Table S4) | S-4  |
| 5. RMSF of apo-MntR and the MntR-Mn <sup>2+</sup> complex (Supplementary Figure S1)                    | S-6  |
| 6. PC2 for all apo- and Mn <sup>2+</sup> -simulations of MntR (Supplementary Figure 2)                 | S-7  |
| 7. Distance between residues 8 and 99 (Supplementary figure S3)                                        | S-8  |
| 8. Native-PAGE electrophoresis (Supplementary figure S4)                                               | S-9  |
| 9. Distance between DNA-binding helices and domains (Supplementary Figure S5)                          | S-10 |
| 10. Coordination of the Mn <sup>2+</sup> atom in the MntR protein (Supplementary Figure S6)            | S-11 |
| 11. Coordination of the Zn <sup>2+</sup> atom in the MntR protein (Supplementary Figure S7)            | S-12 |
| 12. Distance between the C $\alpha$ atoms of Lys41 in MntR (Supplementary Figure S8)                   | S-13 |
| 13. Computationally derived and CD spectra (Supplementary Figure S9)                                   | S-13 |
| 14. References                                                                                         | S-14 |

**Table S1.** Systems of various sizes used for parametrization of the Mn<sup>2+</sup>-protein interaction in the MntR protein. Structures were obtained by excising the Mn<sup>2+</sup>-binding site of MntR from the Mn<sup>2+</sup>-MntR complex (PDB ID: 2F5F [1]) in various ways.

| ID | N° of atoms | Structure                                                                           | ID  | N° of atoms | Structure                                                                             |
|----|-------------|-------------------------------------------------------------------------------------|-----|-------------|---------------------------------------------------------------------------------------|
| S1 | 68          | 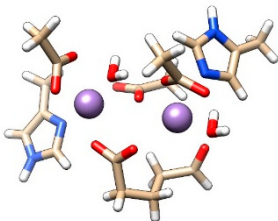   | S8  | 76          |    |
| S2 | 81          |    | S9  | 76          |   |
| S3 | 83          |  | S10 | 78          |  |
| S4 | 70          |  | S11 | 73          |  |
| S5 | 73          |  | S12 | 73          |  |

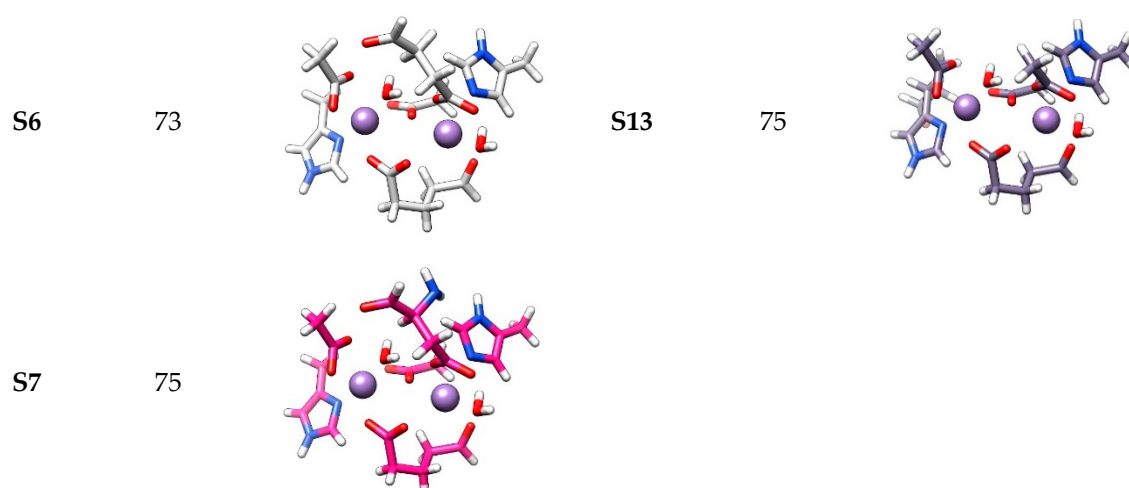

**Table S2.** The root mean square deviation between crystal structures of the *Bacillus subtilis* MntR protein in its Mn<sup>2+</sup>-bound (PDB IDs 2F5F, 2F5C [1]) and its apo-form (PDB IDs 2HYF, 2HYG [2]) calculated for the backbone of the whole dimer, but including only residues 4 to 135, as these are present in all crystal structures. For the structure 2HYF biological assembly 2 was used, while for 2HYG biological assembly 1 was used.

|            | 2F5F | 2F5C | 2HYF – BA2 | 2HYG – BA1 |
|------------|------|------|------------|------------|
| 2F5C       | 0.89 |      |            |            |
| 2HYF – BA2 | 2.14 | 1.72 |            |            |
| 2HYG – BA1 | 2.66 | 2.02 | 1.77       |            |
| 2EV6       | 0.84 | 1.39 | 2.35       | 3.12       |

**Table S3.** The parameters for the Mn<sup>2+</sup> binding site of *B. subtilis* MntR.

| BOND  |       |        | ANGLE    |        |        | ANGLE    |        |        |
|-------|-------|--------|----------|--------|--------|----------|--------|--------|
| atoms |       |        | atoms    |        |        | atoms    |        |        |
| M2-Z3 | 18.51 | 22.874 | CC-Y3-M1 | 38.707 | 129.15 | Y8-M2-Y9 | 19.066 | 109.74 |
| Y1-M1 | 21.28 | 22.455 | CO-Y1-M1 | 41.368 | 91.72  | Y8-M2-Z2 | 25.188 | 93.70  |
| Y2-M1 | 19.38 | 22.921 | CO-Y2-M1 | 64.916 | 89.94  | Y8-M2-Z3 | 42.863 | 87.86  |
| Y3-M1 | 49.35 | 21.794 | CO-Y4-M1 | 19.465 | 125.81 | Y9-M2-Y6 | 19.800 | 85.98  |
| Y4-M1 | 31.25 | 21.540 | CO-Y5-M1 | 69.691 | 89.99  | Y9-M2-Z2 | 24.311 | 156.14 |
| Y5-M1 | 7.26  | 23.707 | CO-Y6-M1 | 89.929 | 94.48  | Y9-M2-Z3 | 20.166 | 88.30  |
| Y6-M1 | 27.71 | 22.498 | CO-Y6-M2 | 31.772 | 143.96 | Z2-M2-Z3 | 47.186 | 88.17  |
| Y6-M2 | 27.57 | 21.586 | CO-Y8-M2 | 27.655 | 131.19 | 2C-CO-Y1 | 70.0   | 117.00 |
| Y8-M2 | 36.74 | 21.254 | CO-Y9-M2 | 22.247 | 131.60 | 2C-CO-Y2 | 70.0   | 117.00 |
| Y9-M2 | 47.29 | 20.888 | CR-Z2-M2 | 78.640 | 122.47 | 2C-CO-Y4 | 70.0   | 117.00 |
| Z2-M2 | 18.34 | 21.805 | M1-Y3-CR | 36.91  | 123.81 | 2C-CO-Y5 | 70.0   | 117.00 |
| C -Z1 | 570.0 | 1.229  | M2-Y6-M1 | 27.856 | 121.54 | 2C-CO-Y6 | 70.0   | 117.00 |
| CC-Y3 | 410.0 | 1.394  | M2-Z2-CV | 92.463 | 130.85 | 2C-CO-Y8 | 70.0   | 117.00 |
| CO-Y1 | 656.0 | 12.500 | M2-Z3-HL | 24.247 | 104.15 | 2C-CO-Y9 | 70.0   | 117.00 |
| CO-Y2 | 656.0 | 12.500 | Y1-M1-Y2 | 73.783 | 58.18  | CC-CV-Z2 | 70.0   | 120.00 |
| CO-Y4 | 656.0 | 12.500 | Y1-M1-Y3 | 22.947 | 104.91 | CC-Y3-CR | 70.0   | 117.00 |

|       |       |        |          |        |        |          |      |        |
|-------|-------|--------|----------|--------|--------|----------|------|--------|
| CO-Y5 | 656.0 | 12.500 | Y1-M1-Y4 | 24.406 | 151.35 | CR-Z2-CV | 70.0 | 117.00 |
| CO-Y6 | 656.0 | 12.500 | Y1-M1-Y5 | 44.215 | 86.99  | CT-CC-Y3 | 70.0 | 120.00 |
| CO-Y8 | 656.0 | 12.500 | Y1-M1-Y6 | 35.033 | 94.25  | CW-CC-Y3 | 70.0 | 120.00 |
| CO-Y9 | 656.0 | 12.500 | Y2-M1-Y3 | 23.739 | 100.99 | NA-CR-Z2 | 70.0 | 120.00 |
| CR-Z2 | 488.0 | 1.335  | Y2-M1-Y4 | 33.126 | 95.39  | O2-CO-Y8 | 80.0 | 126.00 |
| Y3-CR | 488.0 | 1.335  | Y2-M1-Y5 | 35.212 | 144.79 | CX-C -Z1 | 80.0 | 120.40 |
| Z2-CV | 410.0 | 1.394  | Y2-M1-Y6 | 56.005 | 116.20 | Y2-CO-Y1 | 80.0 | 126.00 |
| Z3-HL | 553.0 | 0.9572 | Y3-M1-Y4 | 30.012 | 89.92  | Y3-CR-H5 | 50.0 | 120.00 |
| Y7-HL | 553.0 | 0.9572 | Y3-M1-Y5 | 33.989 | 92.32  | Y3-CR-NA | 70.0 | 120.00 |
|       |       |        | Y3-M1-Y6 | 27.314 | 142.79 | Y4-CO-Y9 | 80.0 | 126.00 |
|       |       |        | Y4-M1-Y5 | 30.964 | 117.27 | Y6-CO-Y5 | 80.0 | 126.00 |
|       |       |        | Y4-M1-Y6 | 49.631 | 87.81  | Z1-C -N  | 80.0 | 122.90 |
|       |       |        | Y5-M1-Y6 | 66.372 | 56.62  | Z2-CR-H5 | 50.0 | 120.00 |
|       |       |        | Y6-M2-Z2 | 43.018 | 98.47  | Z2-CV-H4 | 50.0 | 120.00 |
|       |       |        | Y6-M2-Z3 | 30.265 | 173.30 | HL-Z3-HL | 100. | 104.52 |
|       |       |        | Y8-M2-Y6 | 21.747 | 90.78  | HL-Y7-HL | 100. | 104.52 |

**Table S4.** The atom names and charges for the Mn<sup>2+</sup> binding site of *B. subtilis* MntR.

| GLU GU2   |       |                      | GLU GU1   |       |                      |
|-----------|-------|----------------------|-----------|-------|----------------------|
| atom name | (PDB) | (force field) charge | atom name | (PDB) | (force field) charge |
| N         | N     | -0.516300            | N         | N     | -0.516300            |
| H         | H     | 0.293600             | H         | H     | 0.293600             |
| CA        | CX    | 0.039700             | CA        | CX    | 0.039700             |
| HA        | H1    | 0.110500             | HA        | H1    | 0.110500             |
| CB        | 2C    | -0.053830            | CB        | 2C    | 0.140007             |
| HB2       | HC    | 0.039483             | HB2       | HC    | -0.019300            |
| HB3       | HC    | 0.039483             | HB3       | HC    | -0.019300            |
| CG        | 2C    | -0.102578            | CG        | 2C    | 0.097607             |
| HG2       | HC    | 0.072351             | HG2       | HC    | -0.044500            |
| HG3       | HC    | 0.072351             | HG3       | HC    | -0.044500            |
| CD        | CO    | 0.535244             | CD        | CO    | 0.685205             |
| OE1       | Y9    | -0.566656            | OE1       | Y1    | -0.559189            |
| OE2       | Y4    | -0.545551            | OE2       | Y2    | -0.694706            |
| C         | C     | 0.536600             | C         | C     | 0.536600             |
| O         | Z1    | -0.538560            | O         | O     | -0.581900            |

  

| GLU GU3   |       |                      | ASP AP1   |       |                      |
|-----------|-------|----------------------|-----------|-------|----------------------|
| atom name | (PDB) | (force field) charge | atom name | (PDB) | (force field) charge |
| N         | N     | -0.516300            | N         | N     | -0.516300            |

|     |    |           |     |    |           |
|-----|----|-----------|-----|----|-----------|
| H   | H  | 0.293600  | H   | H  | 0.293600  |
| CA  | CX | 0.039700  | CA  | CX | 0.038100  |
| HA  | H1 | 0.110500  | HA  | H1 | 0.088000  |
| CB  | 2C | 0.140007  | CB  | 2C | -0.030300 |
| HB2 | HC | -0.019300 | HB2 | HC | -0.012200 |
| HB3 | HC | -0.019300 | HB3 | HC | -0.012200 |
| CG  | 2C | 0.097607  | CG  | CO | 0.663163  |
| HG2 | HC | -0.044500 | OD1 | Y8 | -0.630164 |
| HG3 | HC | -0.044500 | OD2 | O2 | -0.688784 |
| CD  | CO | 0.467374  | C   | C  | 0.536600  |
| OE1 | Y5 | -0.589654 | O   | O  | -0.581900 |
| OE2 | Y6 | -0.401108 |     |    |           |
| C   | C  | 0.536600  |     |    |           |
| O   | O  | -0.581900 |     |    |           |

| HIS  |       |               | HD1       |      |       | HIS           |           |      | HE1   |               |           |
|------|-------|---------------|-----------|------|-------|---------------|-----------|------|-------|---------------|-----------|
| atom |       |               | atom      |      |       | atom          |           |      | atom  |               |           |
| name | (PDB) | (force field) | charge    | name | (PDB) | (force field) | charge    | name | (PDB) | (force field) | charge    |
| N    | N     |               | -0.415700 | N    | N     |               | -0.415700 | N    | N     |               | -0.415700 |
| H    | H     |               | 0.271900  | H    | H     |               | 0.271900  | H    | H     |               | 0.271900  |
| CA   | CX    |               | 0.018800  | CA   | CX    |               | -0.058100 | CA   | CX    |               | -0.058100 |
| HA   | H1    |               | 0.088100  | HA   | H1    |               | 0.136000  | HA   | H1    |               | 0.136000  |
| CB   | CT    |               | -0.009200 | CB   | CT    |               | -0.006638 | CB   | CT    |               | -0.006638 |
| HB2  | HC    |               | 0.040962  | HB2  | HC    |               | 0.036700  | HB2  | HC    |               | 0.036700  |
| HB3  | HC    |               | 0.040962  | HB3  | HC    |               | 0.036700  | HB3  | HC    |               | 0.036700  |
| CG   | CC    |               | 0.057384  | CG   | CC    |               | 0.260800  | CG   | CC    |               | 0.260800  |
| ND1  | NA    |               | -0.057102 | ND1  | Y3    |               | -0.220610 | ND1  | Y3    |               | -0.220610 |
| HD1  | H     |               | 0.310384  | CE1  | CR    |               | 0.000000  | CE1  | CR    |               | 0.000000  |
| CE1  | CR    |               | -0.258548 | HE1  | H5    |               | 0.141181  | HE1  | H5    |               | 0.141181  |
| HE1  | H5    |               | 0.254468  | NE2  | NA    |               | -0.149019 | NE2  | NA    |               | -0.149019 |
| NE2  | Z2    |               | -0.068230 | HE2  | H     |               | 0.341589  | HE2  | H     |               | 0.341589  |
| CD2  | CV    |               | -0.182759 | CD2  | CW    |               | -0.283798 | CD2  | CW    |               | -0.283798 |
| HD2  | H4    |               | 0.166071  | HD2  | H4    |               | 0.208386  | HD2  | H4    |               | 0.208386  |
| C    | C     |               | 0.597300  |      | C     |               | 0.597300  |      | C     |               | 0.597300  |
| O    | O     |               | -0.567900 |      | O     |               | -0.567900 |      | O     |               | -0.567900 |

| MN   |       |               | MN2       |      |       | WAT           |           |      | WT1   |               |           |
|------|-------|---------------|-----------|------|-------|---------------|-----------|------|-------|---------------|-----------|
| atom |       |               | atom      |      |       | atom          |           |      | atom  |               |           |
| name | (PDB) | (force field) | charge    | name | (PDB) | (force field) | charge    | name | (PDB) | (force field) | charge    |
| MN   | M2    |               | 1.063.580 | O    | Z3    |               | -0.818191 | O    | Z3    |               | -0.818191 |
|      |       |               |           | H1   | HL    |               | 0.396213  | H1   | HL    |               | 0.396213  |

|             |              |                      |               |    |    |          |
|-------------|--------------|----------------------|---------------|----|----|----------|
|             | MN           | MN1                  |               | H2 | HL | 0.396213 |
| <b>atom</b> |              |                      |               |    |    |          |
| <b>name</b> | <i>(PDB)</i> | <i>(force field)</i> | <b>charge</b> |    |    |          |
|             | MN           | M1                   | 0.890700      |    |    |          |

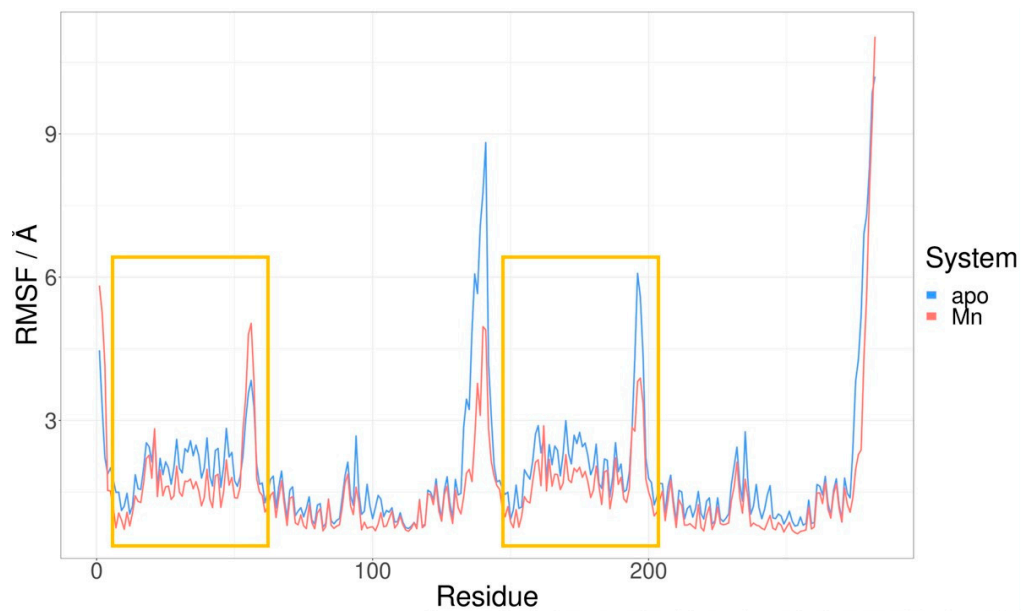

**Figure S1.** Root mean square fluctuations calculated for each residue in the MntR protein in the apo- and Mn<sup>2+</sup>-simulation. The DNA-binding domains are highlighted in yellow.

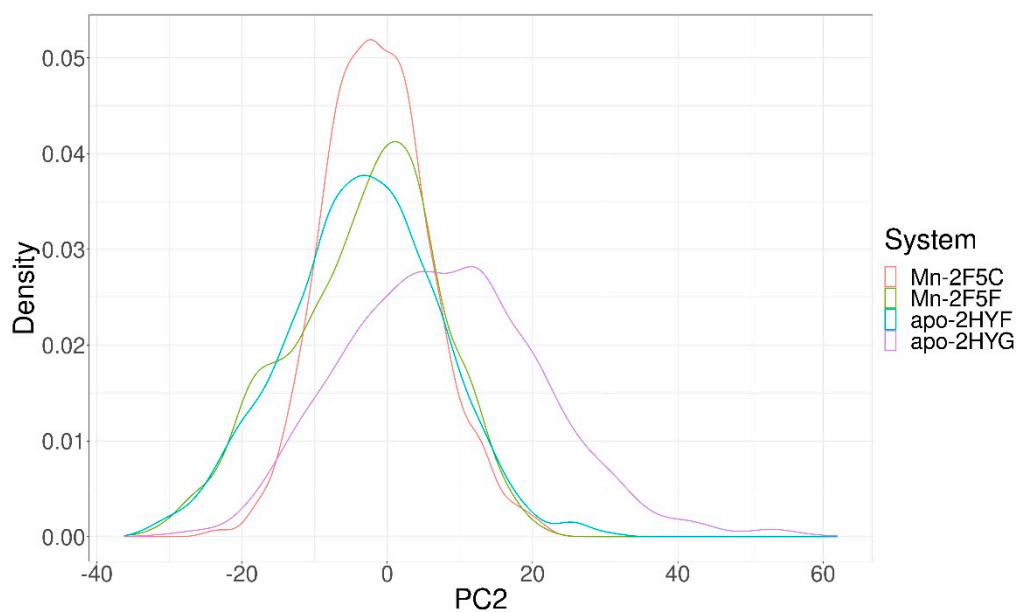

(a)

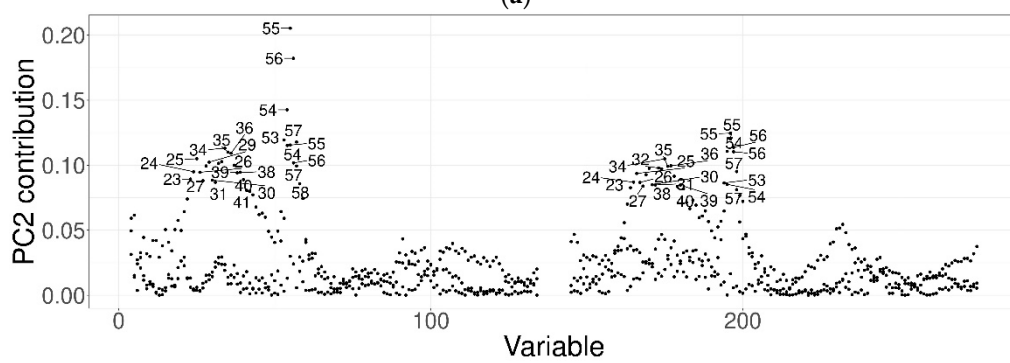

(b)

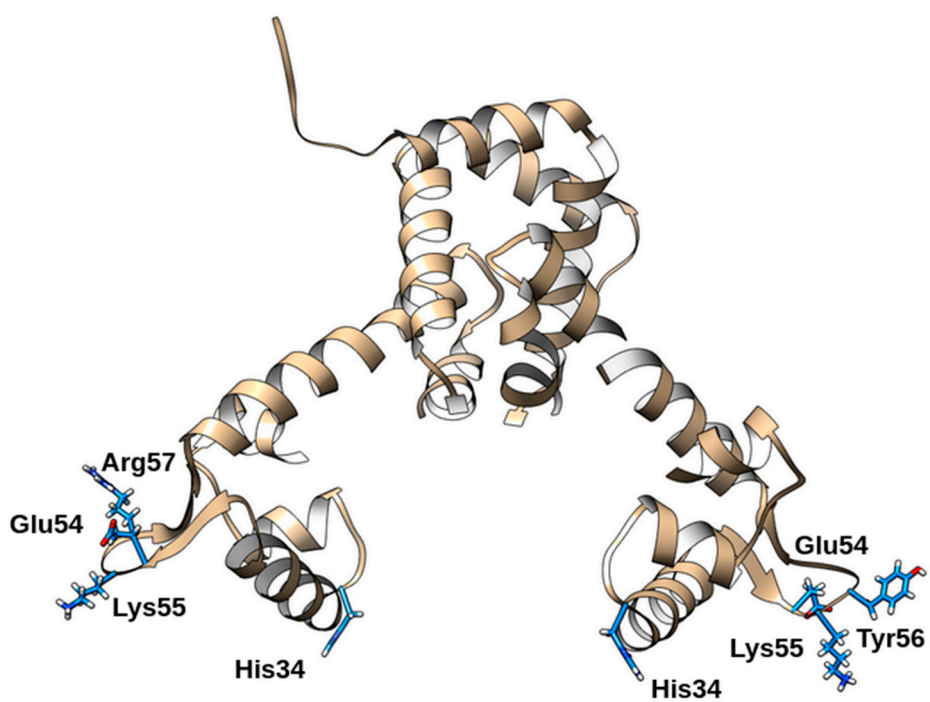

(c)

**Figure S2.** (a) The projection of four trajectories of the MntR protein in its apo- (red and green) and Mn<sup>2+</sup>-bound forms (blue and purple) onto principal component 2 obtained by principal component analysis of the cartesian coordinates of the C $\alpha$  backbone protein atoms. (b) Factor loading for principal component 2 - the labelled points are counted for each chain of the dimer individually. (c) Residues represented in the factor loading are shown in sticks. Most of them are placed in the wing motifs of the DNA-binding domain. The projections of the trajectories onto the second principal component (PC2) are overlapping and all trajectories take up a similar range in the PC2 space. The variance in PC2, thus, likely represents the most pronounced global movements of the protein regardless of the presence of Mn<sup>2+</sup> ions. Factor loadings for PC2 reveal that the largest contributions to these global movements come from the beta-sheet wing motifs in the DNA-binding domain.

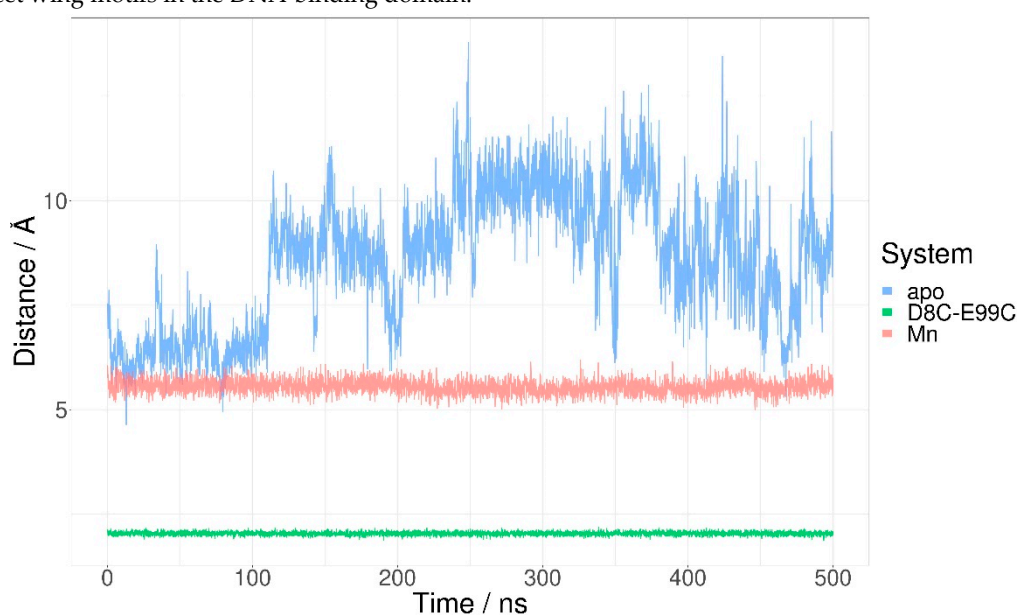

**Figure S3.** The length of the disulphide bond between residues 8 and 99 of the D8C-E99C mutant and the distance between the corresponding atoms of Asp8 (the CG atom) and Glu99 (The CG atom) in simulations of the apo- and Mn<sup>2+</sup>-systems.



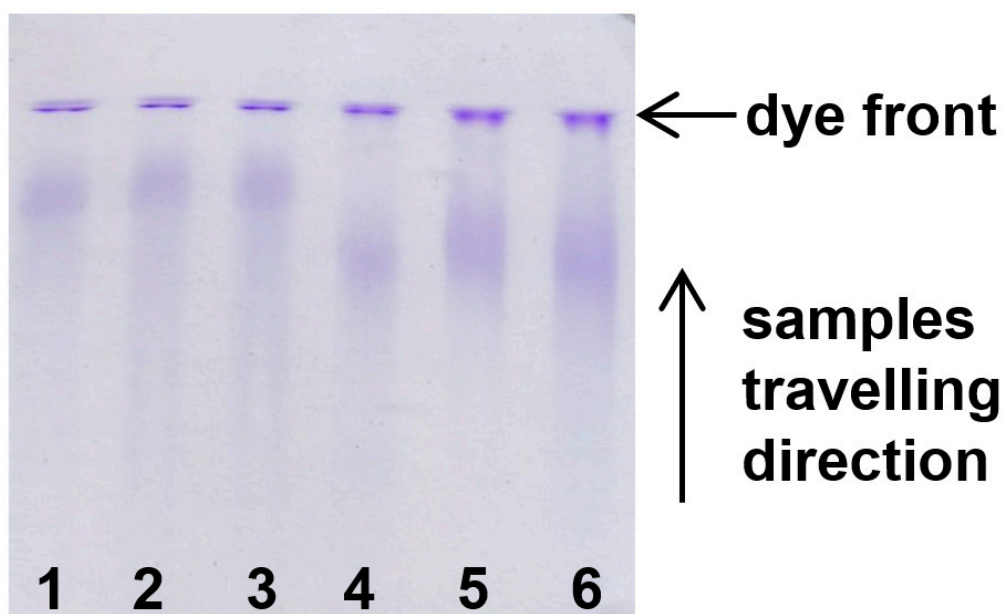

**Figure S4.** The native-PAGE assay of *B. subtilis* MntR protein, wild-type and D8C-E99C mutant, on a 12.5 % gel. Lanes 1, 2 and 3: wild-type MntR alone, with DNA and with both Mn<sup>2+</sup> and DNA, respectively. Lanes 4, 5 and 6: mutant MntR alone, with DNA and with both Mn<sup>2+</sup> and DNA, respectively.

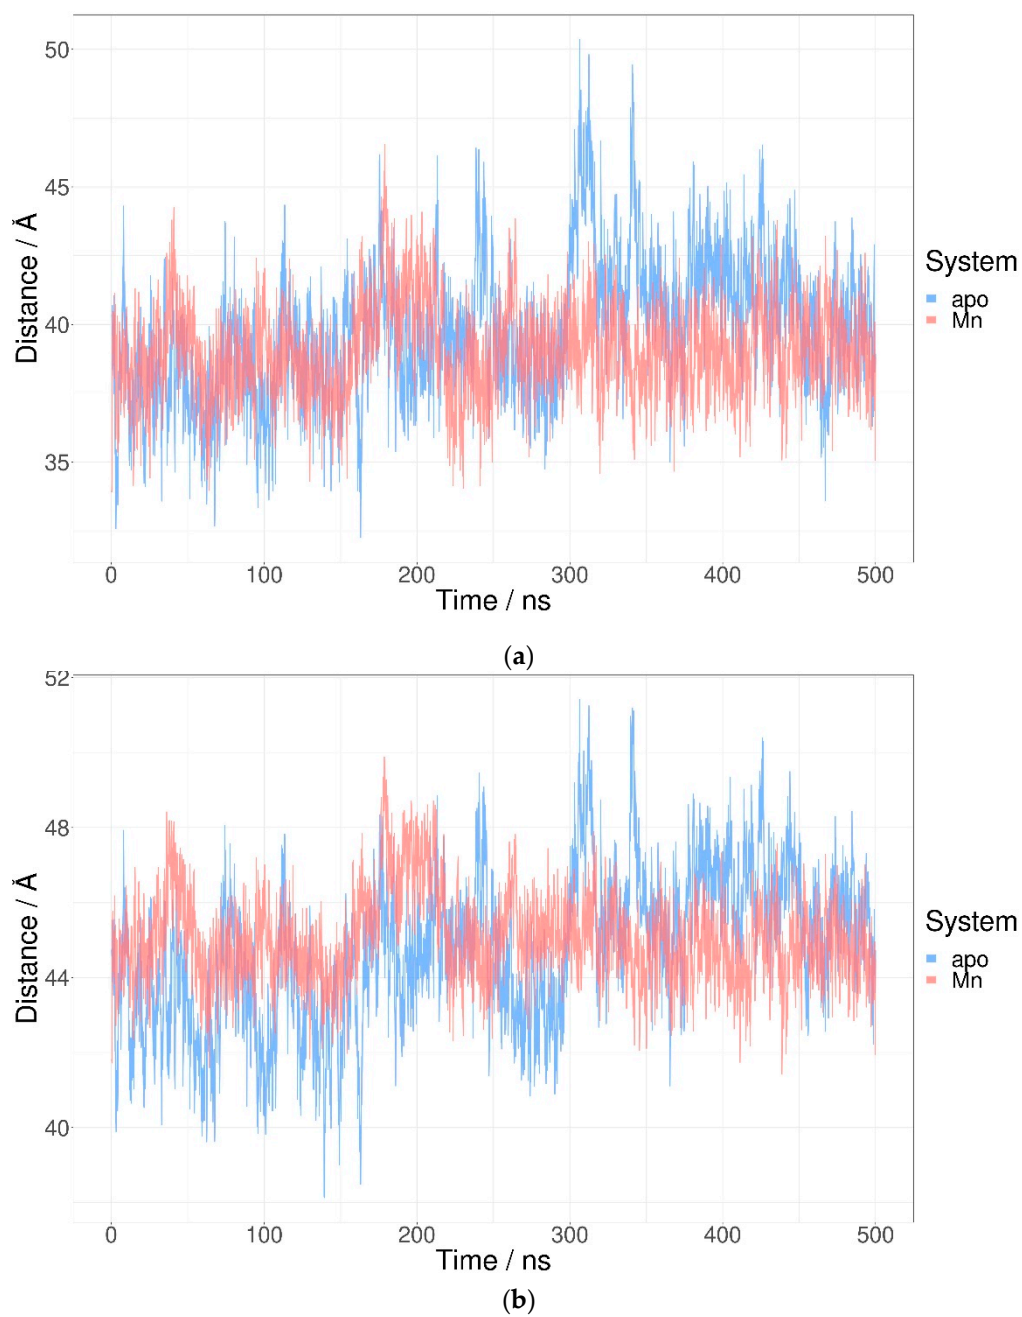

**Figure S5.** (a) The distance between the DNA-binding helices of the MntR protein. (b) The distance between the DNA-binding domains of the MntR protein.

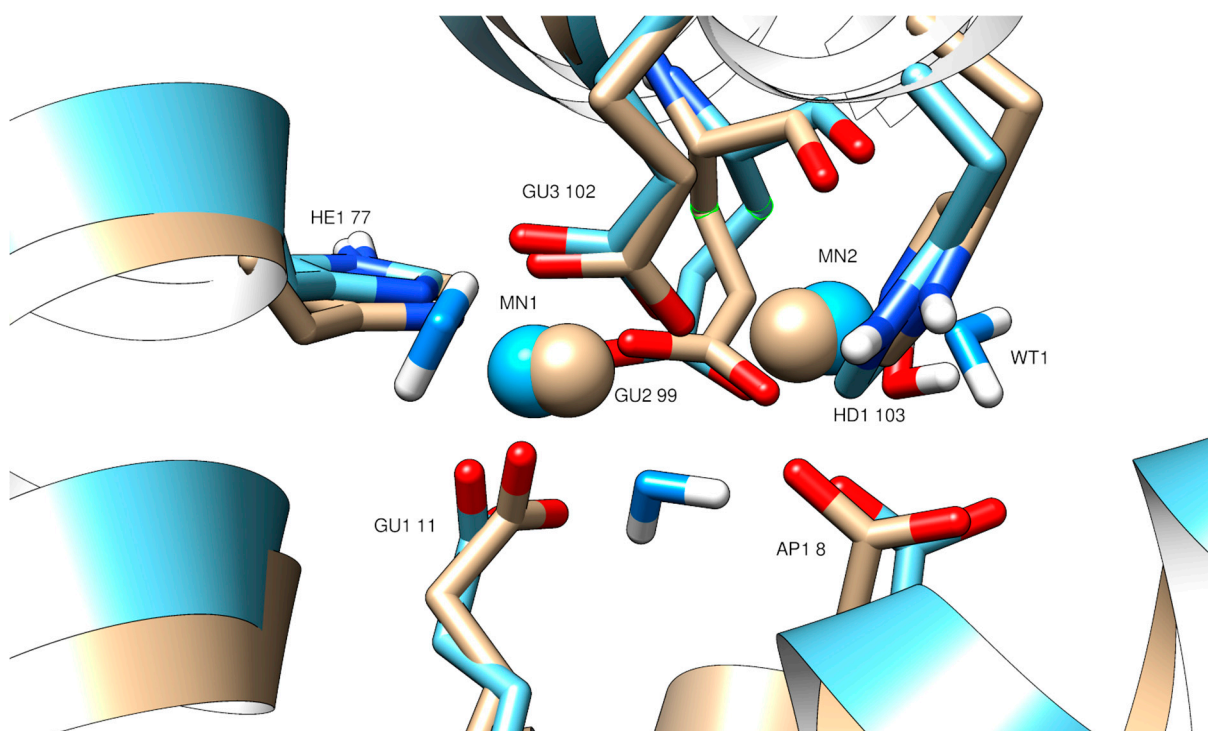

**Figure S6.** The Mn<sup>2+</sup> binding site of *B. subtilis* MntR in the crystal structure (PDB ID: 2F5F [1], blue) and after 500 ns of molecular dynamics simulation (tan).



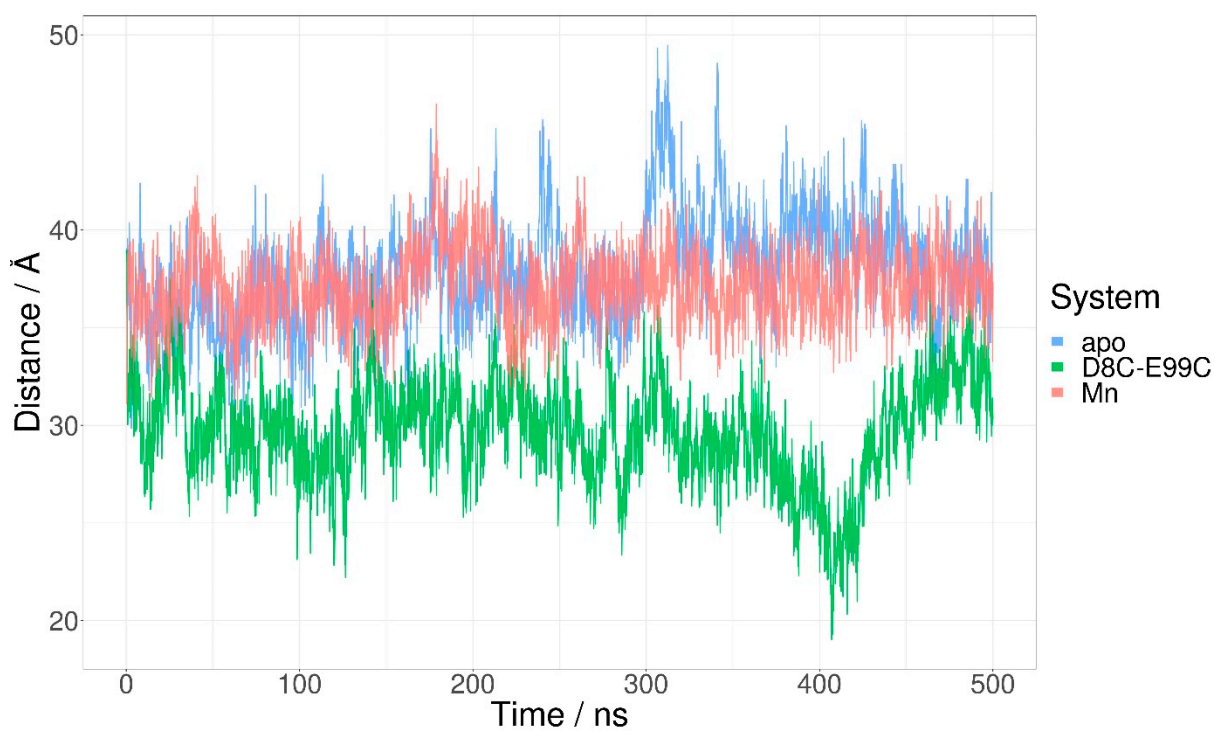

**Figure S8.** The distance between the C $\alpha$  atoms of Lys41 in the two subunits of the MntR dimer for the apo- (blue), Mn<sup>2+</sup>- (pink) and D8C-E99C-mutant (green) systems.

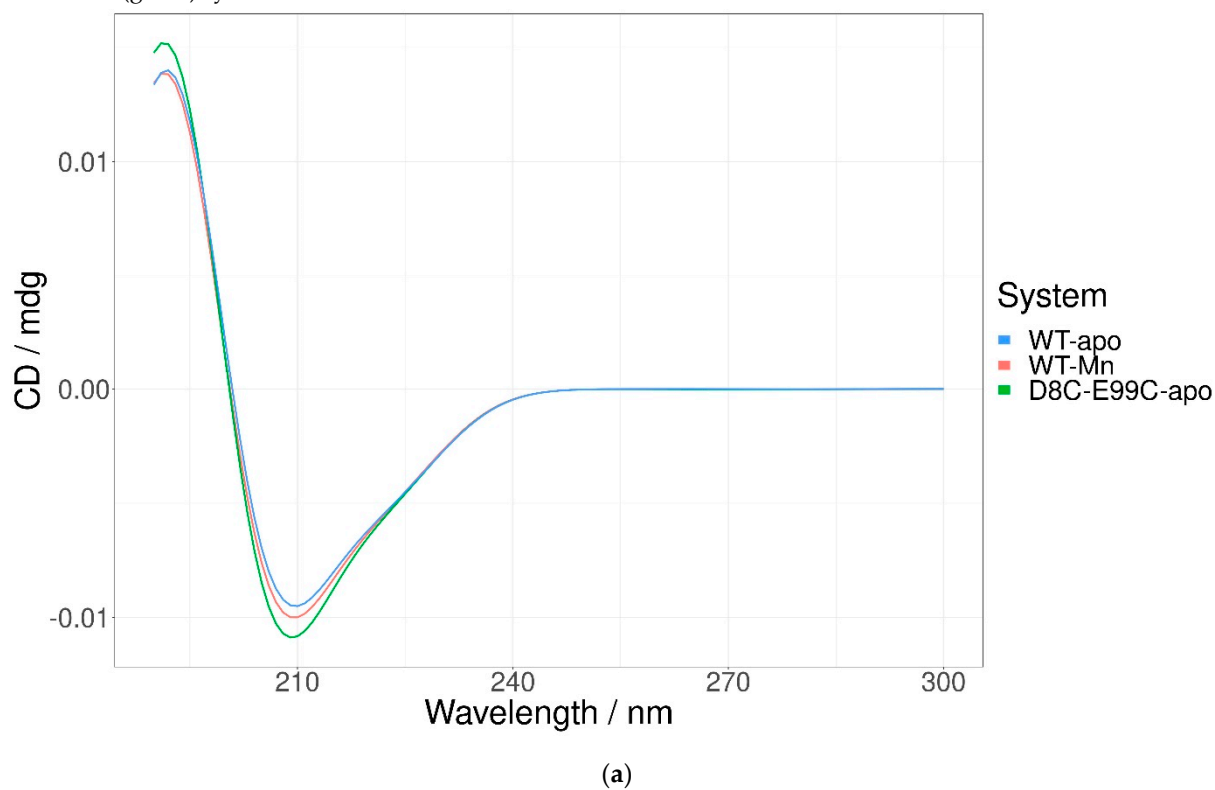

(a)

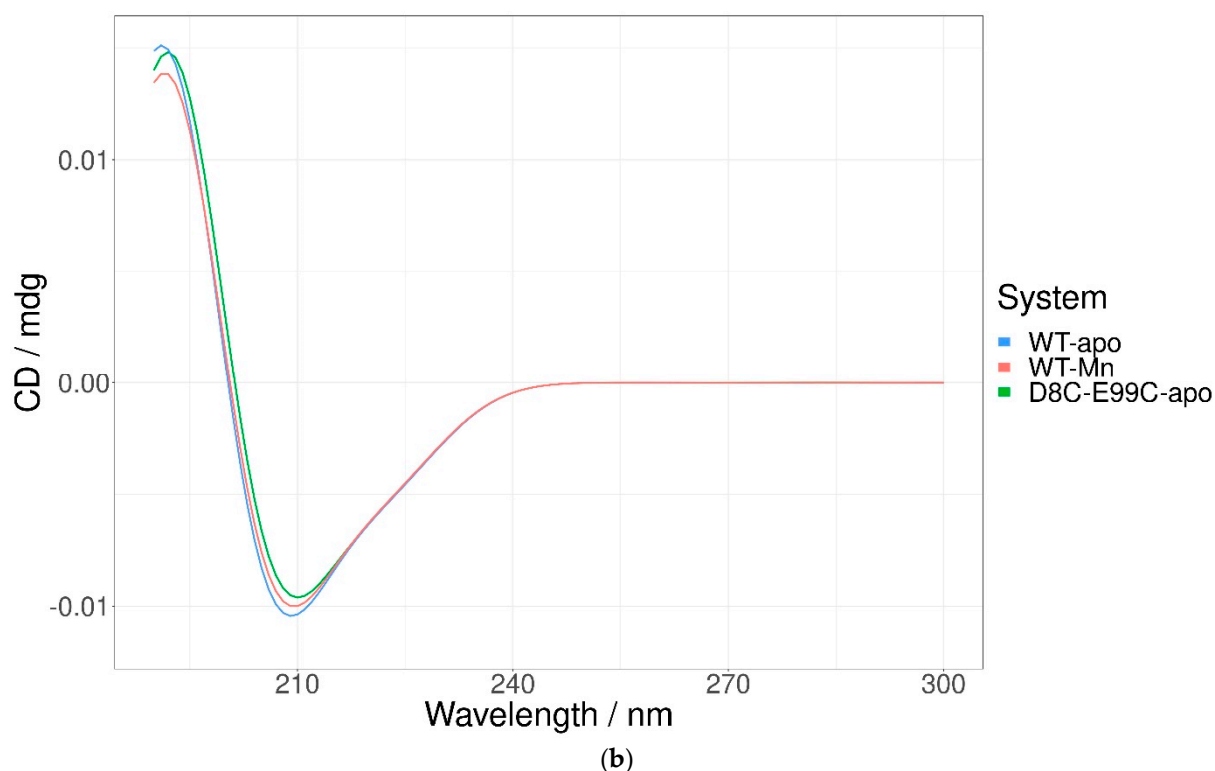

**Figure S9.** The computationally derived CD spectra of the apo- (blue),  $Mn^{2+}$ - (pink) and D8C-E99C-mutant (green) structures calculated using the DichroCalc server [3]. Spectra are calculated either on (a) the structure which is the representative of the largest cluster for each simulation or (b) on the structure which is the representative of the largest (WT-Mn), the third largest (WT-apo) and the second largest cluster (D8C-E99C-apo).

## References

1. Kliegman, J.I.; Griner, S.L.; Helmann, J.D.; Brennan, R.G.; Glasfeld, A. Structural Basis for the Metal-Selective Activation of the Manganese Transport Regulator of *Bacillus Subtilis*. *Biochemistry* **2006**, *45*, 3493–3505, doi:10.1021/bi0524215.
2. DeWitt, M.A.; Kliegman, J.I.; Helmann, J.D.; Brennan, R.G.; Farrens, D.L.; Glasfeld, A. The Conformations of the Manganese Transport Regulator of *Bacillus Subtilis* in Its Metal-Free State. *Journal of Molecular Biology* **2007**, *365*, 1257–1265, doi:10.1016/j.jmb.2006.10.080.
3. Jasim, S.B.; Li, Z.; Guest, E.E.; Hirst, J.D. DichroCalc: Improvements in Computing Protein Circular Dichroism Spectroscopy in the Near-Ultraviolet. *Journal of Molecular Biology* **2018**, *430*, 2196–2202, doi:10.1016/j.jmb.2017.12.009.
